# Supplementary material for: Poverty line income and fisheries subsidies in developing country fishing communities
Source: Research Square preprint supplement (doi:10.21203/rs.3.rs-2731208/v1), 2023-03-28
Supplement: Supplementary file 1 [file 0d89a300ab6600001b04e0dd.docx]

| SI Table 1. Contribution (%) of fish and seafood to total animal protein supply by country income group as per World Bank classification, and geographical region. Countries are listed in order of fish dependency. Fish protein % is based on food balance sheet data from the United Nations Food and Agriculture Organization (FAO) Statistics Division (<http://faostat3.fao.org>) unless otherwise noted. | | | |
| --- | --- | --- | --- |
| **Country** | **Fish protein %** | **Income group** | **Geographical region** |
| Kiribati1 | 84 | Low mid | Oceania |
| Sierra Leone | 76 | Low | Sub-Saharan Africa |
| Tuvalu1 | 71 | Upper mid | Oceania |
| Cambodia | 65 | Low mid | East & South East Asia |
| Comoros | 57 | Low | Sub-Saharan Africa |
| Vanuatu1 | 56 | Low mid | Oceania |
| Bangladesh | 56 | Low mid | South Asia |
| Gambia | 49 | Low | Sub-Saharan Africa |
| Sao Tome Principe | 48 | Low mid | Sub-Saharan Africa |
| Senegal | 44 | Low | Sub-Saharan Africa |
| Togo | 43 | Low | Sub-Saharan Africa |
| Myanmar | 42 | Low mid | East & South East Asia |
| Mozambique | 37 | Low | Sub-Saharan Africa |
| Cote d'Ivoire | 35 | Low mid | Sub-Saharan Africa |
| Benin | 35 | Low | Sub-Saharan Africa |
| Guinea | 33 | Low | Sub-Saharan Africa |
| Congo Dem Rep2 | 31 | Low | Sub-Saharan Africa |
| Angola | 25 | Low mid | Sub-Saharan Africa |
| Tanzania | 24 | Low | Sub-Saharan Africa |
| Madagascar | 16 | Low | Sub-Saharan Africa |
| Haiti | 12 | Low | Latin America & Caribbean |
| Mauritania | 10 | Low mid | Sub-Saharan Africa |
| Yemen | 7 | Low mid | Middle East & North Africa |
| Timor Leste | 7 | Low mid | East & South East Asia |
| Liberia | 6 | Low | Sub-Saharan Africa |
| Djibouti | 4 | Low mid | Middle East & North Africa |
| Guinea Bissau | 4 | Low | Sub-Saharan Africa |
| Somalia | 3 | Low | Sub-Saharan Africa |
| Sudan | <1 | Low mid | Sub-Saharan Africa |
| Eritrea3 | <1 | Low | Sub-Saharan Africa |
| 1 Source of fish protein %: [1]  2 Source of fish protein %: [2]  3 No data in FAOSTAT. Fish plays a very minor role in the national diet [3]. Therefore we assigned Eritreaa fish protein % that was equal to the lowest percentage of all assessed countries (<1% for Sudan). | | | |

| SI Table 2. List of countries summarising the number of fishers, average household size, and reference for fishers’ income data. | | | |
| --- | --- | --- | --- |
| **Country** | **No. fishers** | **Household size** | **Source for income data** |
| Angola | 135,000 | 6.0 | [4] |
| Bangladesh | 1,726,420 | 4.5 | [5] |
| Benin | 74,200 | 6.0 | [4] |
| Cambodia | 578,468 | 4.6 | [5] |
| Comoros | 38,000 | 5.99 | [6] |
| Congo Dem Republic | 440,0881 | 6.0 | [4] |
| Djibouti | 1,4602 | 6.0 | n/a |
| Eritrea | 7,100 | 6.010 | [7] |
| Gambia | 4,400 | 8.2 | [8] |
| Guinea | 94,500 | 6.0 | [4] |
| Guinea-Bissau | 226,400 | 6.0 | [4] |
| Haiti | 50,0003 | 4.4 | [9] |
| Kiribati | 23,000 | 6.211 | [10] |
| Liberia | 14,400 | 6.0 | [4] |
| Madagascar | 150,000 | 5.0 | [5] |
| Mauritania | 42,5004 | 6.0 | [4] |
| Mozambique | 201,854 | 4.4 | [11] |
| Myanmar | 2,262,000 | 4.2 | [12] |
| Sao Tome and Principe | 2,800 | 3.8 | [4] |
| Senegal | 81,2181 | 8.3 | [13] |
| Sierra Leone | 500,0005 | 5.9 | [14] |
| Solomon Islands | 18,000 | 6.012 | [5] |
| Somalia | 61,000 | 6.313 | [15] |
| Sudan | 9,000 | 5.6 | [16] |
| Tanzania | 203,529 | 4.9 | [5] |
| Timor-Leste | 5,000 6 | 5.8 | [5] |
| Togo | 6,600 | 6.0 | [4] |
| Tuvalu | 1,356 7 | 6.014 | [17] |
| Vanuatu | 13,000 | 4.915 | [18] |
| Yemen | 36,0008 | 6.7 | [5] |
| Data sources: 1 [19];2 [20];3 [21];4 [22]; 5 [14];6 [23];7 [24];8 [25]; 9 [6]; 10 [26];11 [27]; 12 [28]; 13 [29]; 14 [17]; 15[18], Average of urban and rural household income from sale of fish/handicraft/hawker/copra  * Unless noted otherwise, the source for number of fishers is [31] and for household size is [32]. For west African countries based on [4], an average household size of 6 is used, as per the study. | | | |

| SI Table 3. Countries for which fishing income was reported in non-monthly units. | | | |
| --- | --- | --- | --- |
| **Country** | **Income reporting unit** | **Frequency of fishing for standardising to monthly rate** | **Source** |
| Comoros | Day | 6-7 times per week | [6] |
| Sudan | Day | 20 days per month | [16] |

| SI Table 4. List of assessed countries indicating whether fishers’ income was reported as gross or net income. | |
| --- | --- |
| **Country** | **Gross/Net** |
| Angola | Net |
| Bangladesh | Gross |
| Benin | Net |
| Cambodia | Net |
| Comoros | Not specified |
| Congo Dem Rep | Net |
| Djibouti | n/a |
| Eritrea | Net |
| Gambia | Net |
| Guinea | Net |
| Guinea-Bissau | Net |
| Haiti | Net |
| Kiribati | Gross |
| Liberia | Net |
| Madagascar | Net |
| Mauritania | Net |
| Mozambique | Not specified |
| Myanmar | Gross |
| Sao Tome Prn | Net |
| Senegal | Net |
| Sierra Leone | Net |
| Solomon Is | Not specified |
| Somalia | Net |
| Sudan | Gross |
| Tanzania | Gross |
| Timor Leste | Gross |
| Togo | Net |
| Tuvalu | Net |
| Vanuatu | Gross |
| Yemen | Net |

| SI Table 5. Estimated monthly income per fisher and income per capita per day (in 2016 real USD). | | | |
| --- | --- | --- | --- |
| **Country** | **Country type** | **Monthly income (USD per fisher)** | **USD /capita / day** |
| Angola2 | Low mid | 246.00 | 1.37 |
| Bangladesh2 | Low mid | 91.84 | 0.69 |
| Benin1 | Low | 171.00 | 0.95 |
| Cambodia2 | Low mid | 72.57 | 0.52 |
| Comoros1 | Low | 211.33 | 1.19 |
| Congo Dem Rep1 | Low | 6.00 | 0.03 |
| Djibouti2 | Low mid | 149.74 | 0.83 |
| Eritrea1 | Low | 149.74 | 0.83 |
| Gambia1 | Low | 289.96 | 1.17 |
| Guinea1 | Low | 51.00 | 0.28 |
| Guinea-Bissau1 | Low | 18.00 | 0.10 |
| Haiti1 | Low | 8.55 | 0.06 |
| Kiribati2 | Low mid | 142.96 | 0.77 |
| Liberia1 | Low | 177.00 | 0.98 |
| Madagascar1 | Low | 66.38 | 0.45 |
| Mauritania2 | Low mid | 93.00 | 0.52 |
| Mozambique1 | Low | 59.36 | 0.45 |
| Myanmar2 | Low mid | 198.05 | 1.56 |
| Sao Tome Prn2 | Low mid | 45.00 | 0.25 |
| Senegal1 | Low | 136.84 | 0.55 |
| Sierra Leone1 | Low | 18.48 | 0.10 |
| Solomon Is2 | Low mid | 119.90 | 0.67 |
| Somalia1 | Low | 152.22 | 0.81 |
| Sudan2 | Low mid | 70.14 | 0.42 |
| Tanzania1 | Low | 153.40 | 1.05 |
| Timor Leste2 | Low mid | 131.22 | 0.75 |
| Togo1 | Low | 69.00 | 0.38 |
| Tuvalu3 | Upper mid | 10.14 | 0.06 |
| Vanuatu2 | Low mid | 74.94 | 0.51 |
| Yemen2 | Low mid | 149.74 | 0.75 |
| **Average** |  | **226.16** | **1.91** |
| 1Low income country  2Lower middle income country  3Upper middle income country  4High income country | | | |

| SI Table 6. Total estimated annual cost (million USD) for covering the USD 1.90 and Minimum Living Wage (MLW) PLI gaps for fishers under 3 livelihood scenarios: Fishing only = fishing is the only source of household income; ML 50 and ML 85 = Presence of multiple livelihoods in which fishing contributes to 50% and 85% of household income, respectively. A dash indicates no cost (i.e., fishing income is above the PLI). | | | | | | |
| --- | --- | --- | --- | --- | --- | --- |
| **Country** | **Cost for USD 1.90 PLI** | | | **Cost for MLW PLI** | | |
|  | Fishing only | ML 85 | ML 50 | Fishing only | ML85 | ML50 |
| Angola | 26.28 | 14.40 | - | - | - | - |
| Bangladesh | 765.71 | 689.55 | 334.15 | 171.69 | 95.53 | - |
| Benin | 25.73 | 21.19 | - | 18.43 | 13.89 | - |
| Cambodia | 290.38 | 270.83 | 179.59 | 101.51 | 81.96 | - |
| Comoros | 9.79 | 6.87 | - | 5.08 | 2.15 | - |
| Congo Dem Rep | 299.85 | 298.90 | 294.49 | 286.59 | 285.65 | 281.24 |
| Djibouti | 0.57 | 0.49 | 0.13 | 2.08 | 2.00 | 1.64 |
| Eritrea | 2.77 | 2.39 | 0.61 | 5.24 | 4.86 | 3.08 |
| Gambia | 1.17 | 0.83 | - | - | - | - |
| Guinea | 55.76 | 54.50 | 46.77 | 43.57 | 41.85 | 33.80 |
| Guinea-Bissau | 148.74 | 147.29 | 140.48 | 209.90 | 208.44 | 201.63 |
| Haiti | 33.50 | 33.29 | 32.33 | 34.15 | 33.95 | 32.98 |
| Kiribati | 9.50 | 8.36 | 3.05 | 18.90 | 17.76 | 12.45 |
| Liberia | 4.82 | 3.91 | - | 1.16 | 0.25 | - |
| Madagascar | 79.55 | 75.23 | 55.08 | 1.06 | - | - |
| Mauritania | 21.46 | 21.50 | 14.42 | 14.50 | 13.09 | 6.49 |
| Mozambique | 106.63 | 100.74 | 73.27 | 36.24 | 30.36 | 2.88 |
| Myanmar | 277.13 | 49.21 | - | 1,093.57 | 865.64 | - |
| Sao Tome Principe | 1.69 | 1.64 | 1.43 | 1.37 | 1.33 | 1.12 |
| Senegal | 40.05 | 37.18 | 23.78 | 32.46 | 29.59 | 16.19 |
| Sierra Leone | 327.70 | 324.33 | 308.64 | 111.33 | 107.96 | 92.27 |
| Solomon Is | 8.11 | 7.33 | 3.73 | 4.03 | 3.26 | - |
| Somalia | 11.92 | 10.35 | 3.03 | 17.47 | 14.28 | - |
| Sudan | 4.87 | 4.62 | 3.49 | 3.42 | 3.18 | 2.04 |
| Tanzania | 62.83 | 49.00 | - | - | - | - |
| Timor Leste | 2.10 | 1.86 | 0.73 | 1.36 | 1.12 | - |
| Togo | 3.65 | 3.49 | 2.73 | 3.24 | 3.08 | 2.32 |
| Tuvalu | 0.91 | 0.91 | 0.88 | 2.45 | 2.45 | 2.42 |
| Vanuatu | 6.60 | 6.17 | 4.18 | 9.10 | 8.67 | 6.68 |
| Yemen | 15.13 | 13.40 | 5.30 | 19.73 | 18.00 | 9.90 |

| SI Table 7. Amount of harmful subsidies provided annually per country (2016 real USD). Source: [32] | |
| --- | --- |
| **Country** | **Harmful subsidies (2016 USD)** |
| Angola2 | 27,198,540 |
| Bangladesh2 | 81,912,252 |
| Benin1 | 1,093,052 |
| Cambodia2 | 10,879,104 |
| Comoros1 | 55,700,004 |
| Congo Dem Rep1 | 302,615 |
| Djibouti2 | 3,145,087 |
| Eritrea1 | 10,613,132 |
| Gambia1 | 15,284,364 |
| Guinea1 | 13,811,071 |
| Guinea-Bissau1 | 91,003 |
| Haiti1 | 1,362,018 |
| Kiribati2 | 17,415,253 |
| Liberia1 | 2,469,737 |
| Madagascar1 | 27,901,178 |
| Mauritania2 | 27,415,458 |
| Mozambique1 | 19,908,911 |
| Myanmar2 | 96,233,492 |
| Sao Tome Prn2 | 1,254,177 |
| Senegal1 | 245,864,446 |
| Sierra Leone1 | 6,357,940 |
| Solomon Is2 | 23,174,737 |
| Somalia1 | 398,335 |
| Sudan2 | 649,519 |
| Tanzania1 | 3,157,529 |
| Timor Leste2 | - |
| Togo1 | 1,783,000 |
| Tuvalu3 | 395,114 |
| Vanuatu2 | 11,705,028 |
| Yemen2 | 142,368,542 |
| **Total** | **853,488,275** |
| 1Low income country; 2Lower middle income country; 3Upper middle income country | |

| SI Table 8.Range in fishers’ incomes documented in case studies used in the present study. Variation in income shows how many times higher the high income is relative to the low income. Between or within indicates whether the income variation occurs within the same or between different fisheries, gears, boat types, or fishing personnel (i.e., crew or owner-operators) | | | | | | |
| --- | --- | --- | --- | --- | --- | --- |
| **Case study country** | **Fisher income** | | **Income units** | **Variation in income**  **(High/Low)** | **Between or within gear(s), fishery(ies), fishers** | **Source** |
|  | **Low** | **High** |  |  |  |  |
| Comoros | 25 | 63 | Pounds/day | 2.51 | Between fisheries, powerboat - canoe | [6] |
| Eritrea | 2400 | 3600 | Birr/year | 1.5 | Within fishery, crew-skipper | [7] |
| Gambia | 425 | 700 | Dalasis/month | 1.65 | Between gears, Bakau (site 1) | [8] |
|  | 120 | 295 | Dalasis/month | 2.46 | Between gears, Taji (site 2) |  |
| Haiti | 29799 | 40725 | Gourdes/year | 1.37 | Between fisheries, artisanal-industrial | [9] |
| Senegal | 1033 | 1638 | Euro/year | 1.59 | Between fisheries | [13] |
|  |  |  |  |  |  |  |
| Somalia | 152 | 264 | USD/month | 1.73 | Within, crew-boat owner in 2012 | [15] |
| Somalia | 292 | 586 | USD/month | 2.01 | Within, crew-boat owner in 2014 |  |
| Somalia | 480 | 1300 | USD/month | 2.71 | Within, crew-boat owner in 2018 |  |
| Yemen | 1500 | 2000 | YER/day | 1.33 | Within fishery, fiberglass boat | [5] |
|  | 2000 | 3000 | YER/day | 1.5 | Within fishery, weekly trips |  |
| **Average variation** | |  |  | **1.85** |  |  |

| SI Table 9. Top 10 countries with lowest daily fisher income and corresponding Gini index. Gini index > 40 (in bold) indicates high distributional inequality. | | |
| --- | --- | --- |
| **Country** | **Fisher income (USD/day)** | **Gini index** |
| Congo Dem Rep | 0.03 | **42.1** |
| Haiti | 0.07 | **41.1** |
| Guinea-Bissau | 0.10 | 35.6 |
| Sierra Leone | 0.10 | 35.7 |
| Sao Tome Prn | 0.25 | **56.3** |
| Guinea | 0.27 | 33.7 |
| Togo | 0.38 | **43.1** |
| Sudan | 0.42 | 34.2 |
| Madagascar | 0.45 | **42.6** |
| Mozambique | 0.45 | **54** |
|  |  |  |

**Supplementary References**

1.Bell, J.D., *et al*. Planning the use of fish for food security in the Pacific. *Mar. Policy* **33**, 64–76 (2009).

2.Béné, C., & Heck S. Fish and food security in Africa. *Naga* **28**, 8-13 (2005).

3.FAO*. Fishery and Aquaculture Country Profiles. Eritrea.* <https://www.fao.org/fishery/en/facp/eri?lang=en> (2023).

4.Belhabib, D., Sumaila, U.R., & Pauly, D. Feeding the poor: Contribution of West African fisheries to employment and food security. *Ocean Coast. Manage.* **111**,72–81 (2015). doi: 10.1016/j.ocecoaman.2015.04.010

5.Teh, L.C.L., Ota, Y., Cisneros-Montemayor, A.M., Harrington, L., & Swartz, W. Are fishers poor? Getting to the bottom of marine fisheries income statistics. *Fish Fish.* **21**,471–482 (2020).

6.Hauzer, M. *Community-based governance of artisanal fisheries, Ngazidja island, Comoros*. Master's thesis, University of Victoria <https://dspace.library.uvic.ca/handle/1828/3585> (2011).

7. FAO. The Fisheries of Eritrea, Part I: Sector Review (FAO/TCP/ERT/2251 Terminal Report) (FAO, 1993).

8.Fatajo, F., Tobey, J., & Drammeh, O. Sole fishery value chain assessment. Gambia-Senegal Sustainable Fisheries Programme. (University of Rhode Island, 2010).

9.Guinette, M.P. *La pêche sur Dispositif de Concentration de Poissons (DCP) à Anse d’Hainault: Contribution au Revenu des Marins Pêcheurs et Marge des Distributeurs* Diploma thesis, Université d’état d’Haïti <https://www.memoireonline.com/04/11/4427/m_La-pche-sur-dispositif-de-concentration-de-poissons-DCP--Anse-dHainault--contribution-au-rev0.html> (2009).

10.Reddy, S.M.W., Groves, T., & Nagavarapu, S. Consequences of a Government-Controlled Agricultural Price Increase on Fishing and the Coral Reef Ecosystem in the Republic of Kiribati. *PLOS ONE* **9**, e96817 (2014). doi: 10.1371/journal.pone.0096817

11.Anonymous. Mozambique, Tanzania fishing communities help increase fish stocks. (The World Bank, 2018). <https://www.worldbank.org/en/news/feature/2018/09/17/mozambique-tanzania-fishing-communities-help-increase-fish-stocks> (2018).

12.Khaing, W., Akester, M., Merayo, G.E., Bladon, A., & Mohammed, E.Y. Socioeconomic characteristics of hilsa fishers in the Ayeyarwady Delta, Myanmar: Opportunities and challenges. *International Institute for Environment and Development* https://www.iied.org/16656iied (2018).

13.Ba, A., *et al*. Profitability and economic drivers of small pelagic fisheries in West Africa: A twenty year perspective. *Mar. Policy* **76**,152–158 (2017). doi: 10.1016/j.marpol.2016.11.008

14. Neiland, A., *et al.* Assessing the potential contribution of fisheries to economic development - the case of post-Ebola Sierra Leone. *Nat. Resour.* **7**, 356–376 (2016).

15. Nordic Consulting Group. Impact assessment of the FairFishing project in Berbera, Somaliland. (Nordic Consulting Group, 2013).

16. Amin, M. Suakin:“Forgotten” Sudanese island becomes focus for Red Sea rivalries. *Middle East Eye* <https://www.middleeasteye.net/news/suakin-forgotten-sudanese-island-becomes-focus-red-sea-rivalries> (2018).

17. Tuvalu Central Statistics Division. Population – Census and Surveys Summary of population indicators (Tuvalu Census 2002). (Tuvalu Central Statistics Division, 2015).

18. Vanuatu National Statistics Office. Vanuatu household income and expenditure survey 2010. (Vanuatu National Statistics Office, 2012).

19. FAO. FAO Yearbook. Fishery and aquaculture statistics 2017 (FAO, 2019).

20. de Graff, G., & Garibaldi, L. The value of African fisheries (FAO Fisheries and Aquaculture Circular No. 1093) (FAO, 2014).

21. Schwartz, T. Industrial Fishing Value Chain in Haiti. *Schwartz Research Group*. <https://timothyschwartzhaiti.com/formal-fishing-sector-haiti/> (2019).

22. SRFC. Mauritania. *Sub-Regional Fisheries Commission* <http://spcsrp.org/en/mauritania> (2016).

23. Tilley, A., Burgos., A., Duarte, A., et al. Contribution of women's fisheries substantial, but

overlooked, in Timor-Leste. *Ambio* **50**, 113-124 (2021).

24. Tuvalu Fisheries Department. Annual Report 2016. (Fisheries Department Ministry of Natural Resources, Government of Tuvalu, 2017).

25. Al-Fareh, A. (2018). The impact of the war in Yemen on artisanal fishing of the Red Sea. LSE Middle East Centre Report. (London School of Economics, 2018).

26. Demena, B. *Determinants of fish catch levels in artisanal fishing in Eritrea* [Master of Arts thesis, International Institute of Social Studies]. <https://thesis.eur.nl/pub/10590/Binyam_Final_RP_ECD.pdf> (2011).

27. Watson, M., Claar, D., & Baum, J. Subsistence in isolation: Fishing dependence and perceptions of change on Kiritimati, the world’s largest atoll. *Ocean Coast. Manage.* **123**, 1–8 (2016). doi: 10.1016/j.ocecoaman.2016.01.012

28. Sulu, R.J., *et al*. Livelihoods and Fisheries Governance in a Contemporary Pacific Island Setting. *PLOS ONE* **10(11)**, e0143516 (2015). doi: 10.1371/journal.pone.0143516

29. UNFPA. Population estimation survey 2014 for the 18 pre-war regions of Somalia. (United Nations Population Fund, 2014).

30.Teh, L.C.L., & Sumaila, U.R. Contribution of marine fisheries to worldwide employment. *Fish Fish.* **14**,77–88 (2013). doi: 10.1111/j.1467-2979.2011.00450.x

31. United Nations. *Database on household size and composition 2019* [online database] . UN Department of Economic and Social Affairs, Population Division, New York. <https://www.un.org/development/desa/pd/data/household-size-and-composition> (2019).

32. Sumaila, U.R., *et al*. Skerritt, D., Schuhbauer, A., Ebrahim, N., Li, Y., Kim, H.S., Mallory, T.G., Lam, V.W.L., & Pauly, D. A global dataset on subsidies to the fisheries sector. *Data in Brief* **27**, 104706 (2019). doi: 10.1016/j.dib.2019.104706
